# Supplementary material for: Blocking Notch-Signaling Increases Neurogenesis in the Striatum after Stroke
Source: PubMed Central journal article supplement (PMC7409130; doi:10.3390/cells9071732), 2020-07-20
Supplement: cells-09-01732-s001.pdf [file cells-09-01732-s001.pdf]

1. Supplementary figures

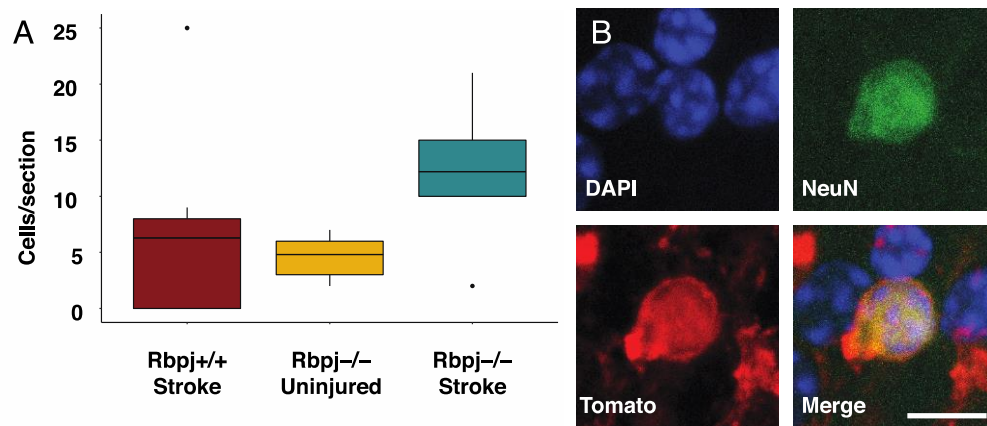

**Figure S1.** Neuroblasts from the striatum mature into NeuN<sup>+</sup> neurons following stroke. **(A)** NeuN<sup>+</sup> cells were quantified and compared between the injured hemisphere of *Rbpj*<sup>-/-</sup> mice (12±7 cells/section; mean±SD), the uninjured hemisphere of the same animals (5±2 cells/section; mean±SD; *p*=0.125), and the injured hemisphere of *Rbpj*<sup>+/+</sup> mice (6±9 cells/section; mean±SD; *p*=0.145). **(B)** Close-up of a NeuN<sup>+</sup>/Tomato<sup>+</sup> cell found in the penumbra of the stroke area (scalebar = 10µm).

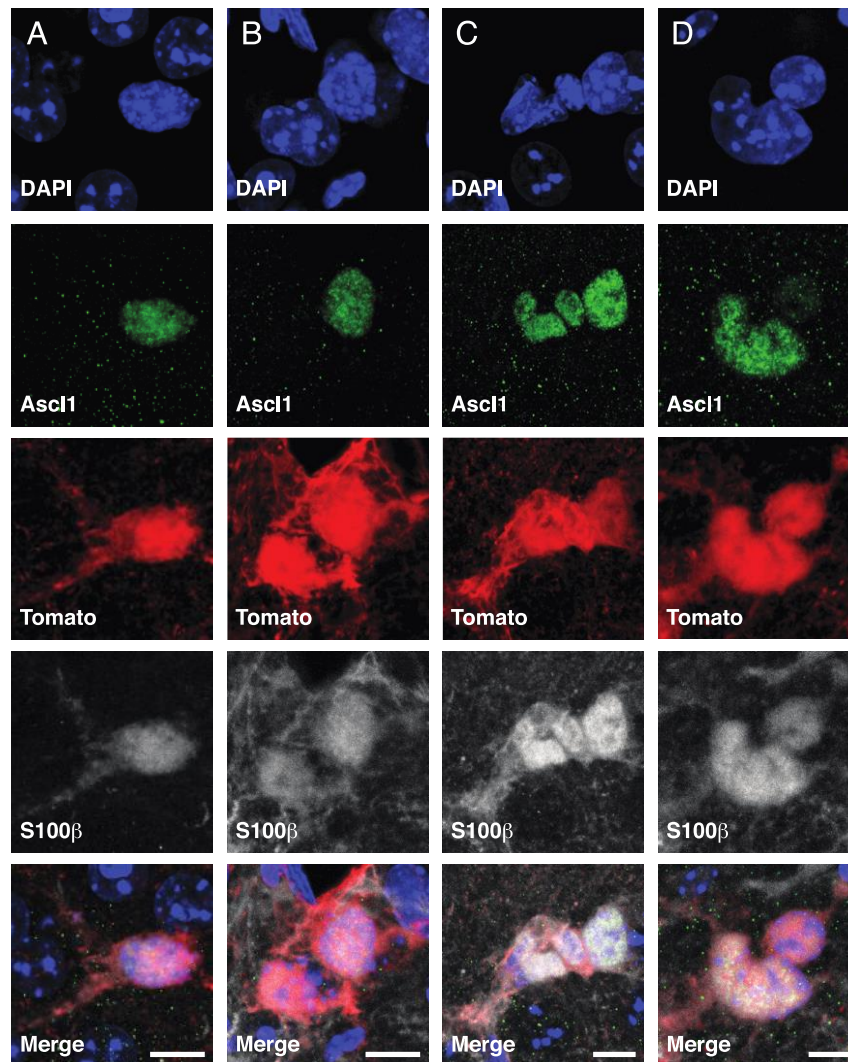

**Figure S2.** *Ascl1*<sup>+</sup>/*Tomato*<sup>+</sup> cells in the penumbra of stroke maintain the expression of the astrocytic marker *S100β*: (**A–B**) Astrocytes during the first stages of differentiation maintain their typical morphology and expression of the marker *S100β* while starting to express the proneural transcription factor *Ascl1*; (**C–D**) *Ascl1*<sup>+</sup> clusters, which maintain the expression of the astrocyte marker *S100β*, lose the astrocytic processes and assume a round morphology more reminiscent of transient amplifying progenitor cells (all scalebars = 10μm).

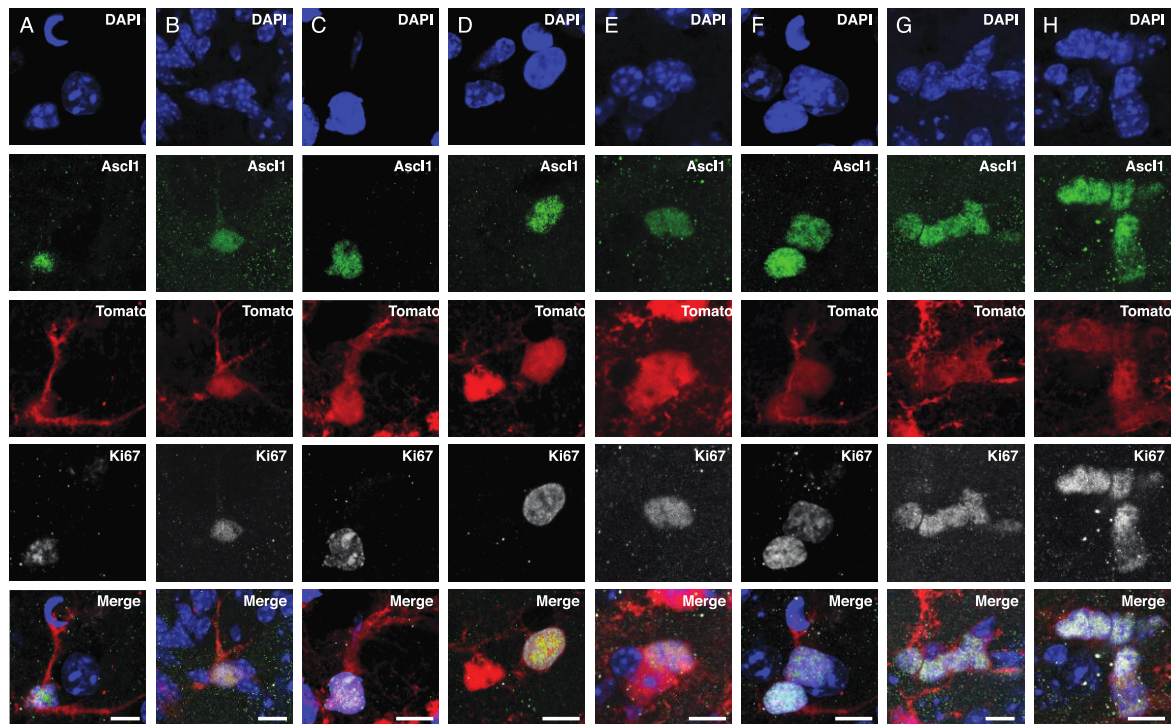

**Figure S3.** Ascl1<sup>+</sup>/Tomato<sup>+</sup> cells in the penumbra of stroke express the proliferation marker Ki67 and proliferate to form clusters: (A–E) Single Ascl1<sup>+</sup>/Tomato<sup>+</sup> cells express the cell proliferation marker Ki67 during the first stages of the cluster formation, while they maintain the typical morphology of astrocytes; (F–H) Clusters of Ascl1<sup>+</sup>/Tomato<sup>+</sup> cells lose the astrocyte processes and assume a round shape after the first divisions while continuing proliferation (all scalebars = 10 $\mu$ m).
